# Supplementary material for: Efficient and controllable vapor to solid doping of the polythiophene P3HT by low temperature vapor phase infiltration
Source: Royal Society of Chemistry journal article supplement (doi:10.1039/c6tc05544c), 2017-01-01
Supplement: c6tc05544c1.pdf [file c6tc05544c1.pdf]

## Supplementary Information

### Efficient and Controllable Vapor to Solid doping of the Polythiophene P3HT by Low Temperature Vapor Phase Infiltration

Weike Wang,<sup>a,b,c</sup> Chaoqiu Chen,<sup>a</sup> Christopher Tollan,<sup>b</sup> Fan Yang,<sup>b</sup> Yong Qin<sup>a\*</sup> and Mato Knez<sup>b,d\*</sup>

<sup>a</sup>State Key Laboratory of Coal Conversion, Institute of Coal Chemistry, Chinese Academy of Sciences, Taiyuan, 030001, China.

<sup>b</sup>CIC nanoGUNE, Tolosa Hiribidea, 76, 20018 Donostia-San Sebastian, Spain.

<sup>c</sup>University of Chinese Academy of Sciences, Beijing, 100049, China.

<sup>d</sup>IKERBASQUE, Basque Foundation for Science, 48011 Bilbao, Spain.

E-mail: [qinyong@sxicc.ac.cn](mailto:qinyong@sxicc.ac.cn), E-mail: [m.knez@nanogune.eu](mailto:m.knez@nanogune.eu)

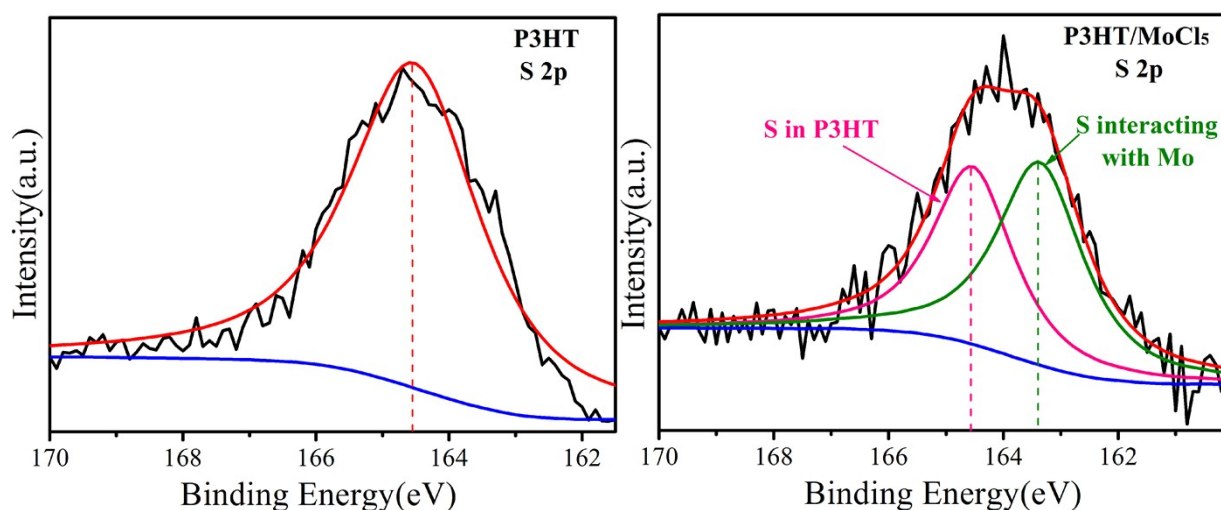

**Figure S1.** S 2p XPS spectra of pristine P3HT (left), and P3HT/MoCl<sub>5</sub>(5 cycles VPI, 70 °C)(right).

In the S 2p XPS spectra, the peak located at 164.56 eV corresponds to the S 2p signal of pristine P3HT. After applying 5 cycles of the MoCl<sub>5</sub> infiltration process at 70 °C, the intensity of the S 2p peak of pristine P3HT decreases and a new peak at a binding energy of 163.39 eV develops, which indicates an electronic exchange between P3HT and MoCl<sub>5</sub> and thus an interaction of Mo with S.
